# Supplementary material for: Association of physical activity with cardiovascular and renal outcomes and quality of life in chronic kidney disease
Source: PubMed Central journal article supplement (PMC5568323; doi:10.1371/journal.pone.0183642), 2017-08-23
Supplement: pone.0183642.s001.pdf [file pone.0183642.s001.pdf]

**Supplementary Table 1: Questions for adults on physical activity with corresponding variable names, NHANES 2003-2006**

| Domain                                                          | Questions                                                                                                                                                                                                                                                                                                                                                                      | 2003-2004          | 2005-2006 |
|-----------------------------------------------------------------|--------------------------------------------------------------------------------------------------------------------------------------------------------------------------------------------------------------------------------------------------------------------------------------------------------------------------------------------------------------------------------|--------------------|-----------|
| Walking and biking                                              | Over the past 30 days, have you walked or bicycled as part of getting to and from work, or school, or to do errands? yes or no or unable to do activity                                                                                                                                                                                                                        | PAD020             | PAQ020    |
|                                                                 | (IF YES) How often did you do this? enter number of days, weeks, or months                                                                                                                                                                                                                                                                                                     | PAQ050Q<br>PAQ050U | PAQ050    |
|                                                                 | (IF YES) On those days when you walked or bicycled, about how long did you spend altogether doing this? enter number of minutes or hours                                                                                                                                                                                                                                       | PAD080             | PAD080    |
| Home/yard physical activity (# minutes per 30 days)             | Over the past 30 days, did you do any tasks in or around your home or yard for at least 10 minutes that required moderate or greater physical effort? By moderate physical effort, I mean tasks that caused light sweating or a slight to moderate increase in your heart rate or breathing, such as raking leaves, mowing the lawn, or heavy cleaning.                        | PAQ100             | PAQ100    |
|                                                                 | (IF YES) How often did you do these tasks in or around your home or yard for at least 10 minutes at a time that required moderate or greater physical effort? enter number of times (past 30 days)                                                                                                                                                                             | PAD120             | PAD120    |
|                                                                 | (IF YES) About how long did you do these tasks each time? enter number of minutes                                                                                                                                                                                                                                                                                              | PAD160             | PAD160    |
| General description of daily activities                         | Please tell me which of the sentences best describes your usual daily activities? (1) You sit during the day and do not walk about very much. (2) You stand or walk about quite a lot during the day but do not have to carry or lift things very often. (3) You lift or carry light loads or have to climb stairs or hills often. (4) You do heavy work or carry heavy loads. | PAQ180             | PAQ180    |
| Vigorous physical activity (PADLEVEL=2) (# minutes per 30 days) | Over the past 30 days, did you do any vigorous activities for at least 10 minutes that cause heavy sweating, or large increases in breathing or heart rate? Some examples are running, lap swimming, aerobics classes, or fast bicycling. (yes or no or unable to do activity)                                                                                                 | PAD200             | PAD200    |
|                                                                 | (IF YES) What vigorous activities did you do? code all activities                                                                                                                                                                                                                                                                                                              | PDACTIV            | PDACTIV   |
|                                                                 | (IF YES) How often did you do X activity? enter number (past 30 days)                                                                                                                                                                                                                                                                                                          | PADTIMES           | PADTIMES  |
|                                                                 | (IF YES) On average, about how long did you do X each time? enter number of minutes                                                                                                                                                                                                                                                                                            | PADDURAT           | PADDURAT  |
| Moderate physical activity (PADLEVEL=1) (# minutes per 30 days) | Over the past 30 days, did you do moderate activities for at least 10 minutes that cause only light sweating or a slight to moderate increase in breathing or heart rate? Some examples are brisk walking, bicycling for pleasure, golf, or dancing. (yes, no, unable to do activities)                                                                                        | PAD320             | PAD320    |
|                                                                 | (IF YES) What activities did you do? code activity                                                                                                                                                                                                                                                                                                                             | PDACTIV            | PDACTIV   |
|                                                                 | (IF YES) How often did you do X activity? enter number (past 30 days)                                                                                                                                                                                                                                                                                                          | PADTIMES           | PADTIMES  |
|                                                                 | (IF YES) On average, about how long did you do X each time? enter number of minutes                                                                                                                                                                                                                                                                                            | PADDURAT           | PADDURAT  |
