# Supplementary material for: Association of physical activity with cardiovascular and renal outcomes and quality of life in chronic kidney disease
Source: PubMed Central journal article supplement (PMC5568323; doi:10.1371/journal.pone.0183642), 2017-08-23
Supplement: pone.0183642.s002.pdf [file pone.0183642.s002.pdf]

# 慢性腎臟病患者之體適能狀況評估之相關研究

## 體適能問卷

### ■身體活動與運動量:(評估過去一個月身體活動與運動情形)

| 身體活動量:(過去一個月中平均每週的運動時間，計算平均每週從事活動的時間)                                                                                                                                                                                          |                                                                                                                                                                                                                                                                                                                         |                      |
|--------------------------------------------------------------------------------------------------------------------------------------------------------------------------------------------------------------------------------|-------------------------------------------------------------------------------------------------------------------------------------------------------------------------------------------------------------------------------------------------------------------------------------------------------------------------|----------------------|
| 類別                                                                                                                                                                                                                             | 運動項目                                                                                                                                                                                                                                                                                                                    | 運動時間(每週總時間)          |
| <p><input type="checkbox"/> <b>費力身體活動量:</b><br/>心跳經常加快、運動時每週有3次↑心跳加快、自覺費力指數有點困難</p> <p><u>做這些活動時會讓你沒辦法一邊活動，一邊跟別人輕鬆說話，這些活動會讓你身體感覺很累，呼吸會比平常快很多，流很多汗、心跳很快。任何活動強度跟”跑步”差不多就算。</u></p>                                               | <p><input type="checkbox"/> 跑步<br/><input type="checkbox"/> 爬山<br/><input type="checkbox"/> 自行車 (16 公里/小時↑)<br/><input type="checkbox"/> 游泳(自由式)<br/><input type="checkbox"/> 打網球<br/><input type="checkbox"/> 打羽球<br/><input type="checkbox"/> 其他：_____</p>                                                            | <p>■平均每週共_____分鐘</p> |
| <p><input type="checkbox"/> <b>中等費力身體活動:</b><br/>心跳偶爾加快、運動時每週有1-2次心跳加快、自覺費力指數輕鬆</p> <p><u>做這些活動時還可以舒服的說話，但無法唱歌，這些活動會讓你身體有點累、有點喘、流一些汗、心跳快一些。任何活動強度跟”快走”差不多持續大於10分鐘就算。</u></p>                                                   | <p><input type="checkbox"/> 快走(5-6公里/小時)<br/><input type="checkbox"/> 氣功<br/><input type="checkbox"/> 種菜<br/><input type="checkbox"/> 土風舞<br/><input type="checkbox"/> 騎腳踏車<br/><input type="checkbox"/> 慢泳<br/><input type="checkbox"/> 勞力家事<br/><input type="checkbox"/> 體操<br/><input type="checkbox"/> 其他：_____</p> | <p>■平均每週共_____分鐘</p> |
| <p><input type="checkbox"/> <b>輕度身體活動量:</b><br/>心跳從不加快、運動時心跳無加快、自覺費力指數非常輕鬆不符合上述兩個標準的狀況</p>                                                                                                                                     | <p><input type="checkbox"/> 散步<br/><input type="checkbox"/> 其他：_____</p>                                                                                                                                                                                                                                                | <p>■平均每週共_____分鐘</p> |
| <p><input type="checkbox"/> <b>無活動力</b></p>                                                                                                                                                                                    |                                                                                                                                                                                                                                                                                                                         |                      |
| <p>■個案身體活動量種類:</p> <p><input type="checkbox"/> 高身體活動量(每週達60分鐘費力身體活動量)</p> <p><input type="checkbox"/> 身體活動量足夠(每周達150分鐘中等費力身體活動量)</p> <p><input type="checkbox"/> 身體活動量不足(不符合上述兩個標準的人)</p> <p><input type="checkbox"/> 無活動力</p> |                                                                                                                                                                                                                                                                                                                         |                      |
